# Supplementary material for: Population dynamics and demographic history of Eurasian collared lemmings
Source: BMC Ecol Evol. 2022 Nov 3;22:126. doi: 10.1186/s12862-022-02081-y (PMC9632076; doi:10.1186/s12862-022-02081-y)
Supplement: Supplementary file 1 — Additional file 1: Table S1. Modern Nuclear Genome sample information. Table S2. Ancient Mitogenome Sample Information. Table S3. Modern Mitogenome Sample Information. Table S4. Divergence times for each node in the phylogenetic tree estimated using BEAST. Table S5. The priors used to specify tip-date information for each ancient sample in the phylogenetic analysis. Table S6. Demographic Modelling using Approximate Bayesian Computation. Table S7. Marginal Likelihood Estimation for demographic models: constant size, skyline, skyride. Table S8. Information used to generate the simulated data for the ABC analysis. [file 12862_2022_2081_MOESM1_ESM.xlsx]

## Sheet: S1 Modern Nuclear Genome Sample
Table S1: Modern Nuclear Genome sample information
Sample ID	UAM ID	Species	Site	Location	Region	Coordinates	Total reads	Mapped Reads	Percent Mapped	Average Coverage	Mitochondrial Clade	Sex	Heterozygosity
P7857	84102*	Dicrostonyx torquatus	10 km SW of Yanrakynnot Village	Chukotka Autonomous Krog	E Siberia	64°52'0" N 172°40' 0"W	735767848	670538611	91.1345	36.9	5a	F	0.00597
*Information retrieved from: http://arctos.database.museum/guid/UAM:Mamm:84102
									q

## Sheet: S2 Ancient Mitogenome Samples
Table S2: Ancient Mitogenome Sample Information
Sample ID	Lab ID	Species	Site	Layer	Site Abbreviation	Geographic Locality	Coordinates	Age (Cal BP)*	OxA number	M reads	Total Coverage	Average Coverage	Mitochondrial Clade	Endogenous DNA (%)	Average Fragment Length	Preservation	Phylogenetic Tree labels
E106	E106	Dicrostonyx torquatus	Betovo	N/A	BET	W Russia	53°20'38.76"N, 34°1'1.9"E	31188±393	OxA-299989	9.2	98.7	4.8	3	27.51	58	Non-permafrost	W_RUS1_31.1k
E183	E183	Dicrostonyx torquatus	Lobva	N/A	LOB	W Russia	59°10'44.79"N, 60°29'54.12"E	14834±364,5	OxA-29633	17.9	97.5	4.2	5	4.95	61	Non-permafrost	W_RUS10_14.9k
E313	E313	Dicrostonyx spp	Batagaika	N/A	BAT	Russia	67°41'33.98"N, 134°39'14.15"E	>50100	OxA-29747	36.1	100**	13.6**	E313	77.4	63	Permafrost	N/A
E335	E335	Dicrostonyx torquatus	Pymva Shor	L6a H1	PYS	W Russia	67°10' N, 60°51' E	15946-15408	N/A	9.1	95.8	3.1	5	8.86	76	Permafrost	W_RUS9_15.5k
E337	E337	Dicrostonyx torquatus	Pymva Shor	L6a	PYS	W Russia	67°10' N, 60°51' E	15946-15408	N/A	11.3	98.4	4.5	5	20.09	64	Permafrost	W_RUS8_15.7k
EL014	E386	Dicrostonyx torquatus	Trou Al'Wesse	15b	TAW	Belgium	50°25'15.6"N, 5°17'38.4"E	43664-36228	N/A	16.8	99.8	6.5	3	10.3	64	Non-permafrost	W_EUR9_39.3k
EL015	E387	Dicrostonyx torquatus	Trou Al'Wesse	15b	TAW	Belgium	50°25'15.6"N, 5°17'38.4"E	43664-36228	N/A	8.4	97.5	3.8	3	24.4	71	Non-permafrost	W_EUR10_38.8k
EL016	E388	Dicrostonyx torquatus	Trou Al'Wesse	15b	TAW	Belgium	50°25'15.6"N, 5°17'38.4"E	43664-36228	N/A	27.4	99.6	6.5	3	26.95	61	Non-permafrost	W_EUR7_40.9k
EL017	E355	Dicrostonyx torquatus	Yangana Pe-4	L2	YAN	Siberia	67°20'24''N, 69°2'24''E	1897-1371	N/A	9	100	9.3	5	65.05	79	Permafrost	W_SIB5_1.5k
EL018	E357	Dicrostonyx torquatus	Yangana Pe-4	L2	YAN	Siberia	67°20'24''N, 69°2'24''E	1897-1371	N/A	11.2	99.8	9.4	5	38.85	66	Permafrost	W_SIB6_1.4k
EL020	E359	Dicrostonyx torquatus	Yangana Pe-4	L2	YAN	Siberia	67°20'24''N, 69°2'24''E	1897-1371	N/A	18	99.9	12.2	5	41.3	68	Permafrost	W_SIB4_1.5k
EL022	E390	Dicrostonyx torquatus	Trou Al'Wesse	15b	TAW	Belgium	50°25'15.6"N, 5°17'38.4"E	43664-36228	N/A	8.8	94.9	3	1	3	76	Non-permafrost	W_EUR11_37.8k
EL048	EL048	Dicrostonyx torquatus	Trou Al'Wesse	12	TAW	Belgium	50°25'15.6"N, 5°17'38.4"E	31805-17185	N/A	16.9	99.8	10.8	4	71.33	53	Non-permafrost	W_EUR14_24.2k
EL049	EL049	Dicrostonyx torquatus	Trou Al'Wesse	12	TAW	Belgium	50°25'15.6"N, 5°17'38.4"E	31805-17185	N/A	11	96.5	3.8	5	83.83	55	Non-permafrost	W_EUR28_11.5k
EL050	EL050	Dicrostonyx torquatus	Trou Al'Wesse	12	TAW	Belgium	50°25'15.6"N, 5°17'38.4"E	31805-17185	N/A	21.4	99.9	14.9	4	51.69	57	Non-permafrost	W_EUR25_20.3k
EL051	EL051	Dicrostonyx torquatus	Trou Al'Wesse	12	TAW	Belgium	50°25'15.6"N, 5°17'38.4"E	31805-17185	N/A	6.4	95.7	3.6	4	82.24	57	Non-permafrost	W_EUR27_19.5k
EL052	EL052	Dicrostonyx torquatus	Trou Al'Wesse	12	TAW	Belgium	50°25'15.6"N, 5°17'38.4"E	31805-17185	N/A	6.2	99.4	5.8	4	83.62	55	Non-permafrost	W_EUR26_20.3k
EL053	EL053	Dicrostonyx torquatus	Trou Al'Wesse	12	TAW	Belgium	50°25'15.6"N, 5°17'38.4"E	31805-17185	N/A	9.1	100	10.7	3	59.81	58	Non-permafrost	W_EUR16_22.4k
EL054	EL054	Dicrostonyx torquatus	Trou Al'Wesse	12 mid	TAW	Belgium	50°25'15.6"N, 5°17'38.4"E	21535-19876	N/A	7.7	100	13.1	4	64.94	50	Non-permafrost	W_EUR23_20.9k
EL056	EL056	Dicrostonyx torquatus	Trou Al'Wesse	12 mid	TAW	Belgium	50°25'15.6"N, 5°17'38.4"E	21535-19876	N/A	26.7	100	21.1	4	62.51	53	Non-permafrost	W_EUR22_21.0k
EL057	EL057	Dicrostonyx torquatus	Trou Al'Wesse	12 mid	TAW	Belgium	50°25'15.6"N, 5°17'38.4"E	21535-19876	N/A	14.2	100	10.7	3	66.1	52	Non-permafrost	W_EUR19_21.8k
EL058	EL058	Dicrostonyx torquatus	Trou Al'Wesse	12 mid	TAW	Belgium	50°25'15.6"N, 5°17'38.4"E	21535-19876	N/A	25.8	100	26.7	4	80.36	51	Non-permafrost	W_EUR24_20.4k
EL059	EL059	Dicrostonyx torquatus	Trou Al'Wesse	12	TAW	Belgium	50°25'15.6"N, 5°17'38.4"E	22217‐21452	N/A	4.7	97.1	3.7	5	71.63	57	Non-permafrost	W_EUR21_21.5k
EL060	EL060	Dicrostonyx torquatus	Trou Al'Wesse	12	TAW	Belgium	50°25'15.6"N, 5°17'38.4"E	22217‐21452	N/A	5	97.7	4.5	3	60.85	56	Non-permafrost	W_EUR18_21.8k
EL062	EL062	Dicrostonyx torquatus	Trou Al'Wesse	12	TAW	Belgium	50°25'15.6"N, 5°17'38.4"E	22217‐21452	N/A	10.1	100	12.6	3	23.05	56	Non-permafrost	W_EUR17_21.9k
EL063	EL063	Dicrostonyx torquatus	Trou Al'Wesse	12	TAW	Belgium	50°25'15.6"N, 5°17'38.4"E	22217‐21452	N/A	10	100	14.7	3	67.22	58	Non-permafrost	W_EUR20_21.7k
L161L1	L161	Dicrostonyx torquatus	Bisnik Cave	3	BIS	Poland	50°25′35''N, 19°39′54''E	Unknown	N/A	N/A	99.7	17.1	4	8.45	89	Non-permafrost	E_EUR4_22.8k
L165L1	L165	Dicrostonyx torquatus	Bisnik Cave	3	BIS	Poland	50°25′35''N, 19°39′54''E	Unknown	N/A	N/A	99.3	10.3	4	7.74	91	Non-permafrost	E_EUR2_23.8k
L210L1	L210	Dicrostonyx torquatus	Bisnik Cave	3	BIS	Poland	50°25′35''N, 19°39′54''E	18849±174	OxA -27633	N/A	99.7	25.3	5	1.68	90	Non-permafrost	E_EUR5_18.8k
L211L1	L211	Dicrostonyx torquatus	Bisnik Cave	2	BIS	Poland	50°25′35''N, 19°39′54''E	23443±346	OxA -27906	N/A	99.5	27.9	3	2.25	95	Non-permafrost	E_EUR3_23.4k
L216L1	L216	Dicrostonyx torquatus	Bisnik Cave	5/6	BIS	Poland	50°25′35''N, 19°39′54''E	17539±250	OxA -27589	N/A	97.2	6.5	5	1	71	Non-permafrost	E_EUR9_17.5k
L222L1	L222	Dicrostonyx torquatus	Bisnik Cave	7	BIS	Poland	50°25′35''N, 19°39′54''E	17654±257	OxA -27907	N/A	94.9	5.5	5	0.94	75	Non-permafrost	E_EUR8_17.6k
L224L1	L224	Dicrostonyx torquatus	Bisnik Cave	2/7	BIS	Poland	50°25′35''N, 19°39′54''E	24822±422	OxA -27632	N/A	100	31.8	3	2.17	88	Non-permafrost	E_EUR1_24.8k
L225L1	L225	Dicrostonyx torquatus	Bisnik Cave	7/11	BIS	Poland	50°25′35''N, 19°39′54''E	18483±223	OxA -27908	N/A	99.5	43.4	5	3.41	94	Non-permafrost	E_EUR6_18.4k
L236L1	L236	Dicrostonyx torquatus	Bisnik Cave	S1	BIS	Poland	50°25′35''N, 19°39′54''E	16371±240	OxA -27514	N/A	99.6	20.2	5	15.23	85	Non-permafrost	E_EUR10_16.3k
L237L1	L237	Dicrostonyx torquatus	Bisnik Cave	7/10	BIS	Poland	50°25′35''N, 19°39′54''E	18375±215	OxA -27634	N/A	99.3	29.4	5	20.19	87	Non-permafrost	E_EUR7_18.3k
L242L1	L242	Dicrostonyx torquatus	Bisnik Cave	D-E	BIS	Poland	50°25′35''N, 19°39′54''E	15665±278	OxA -2759	N/A	98.4	8.2	5	8.77	92	Non-permafrost	E_EUR11_15.6k
MAM001	E408	Dicrostonyx torquatus	Yangana Pe-4	L1	YAN	Siberia	67°20'24''N, 69°2'24''E	1174-0	N/A	22.2	99.9	13.1	5	53.15	64	Permafrost	W_SIB7_1.3k
MAM002	E011	Dicrostonyx torquatus	Marie-Jeanne Cave	Horizon 4, terre jaune en-dessous de la concr	MJC	Belgium	50°7'48"N, 4°28'33.6"E	56580-42622	N/A	4.8	96.3	3.8	1	58.65	46	Non-permafrost	W_EUR5_47.1k
MAM003	E031	Dicrostonyx torquatus	Marie-Jeanne Cave	Horizon 5, niveau B	MJC	Belgium	50°7'48"N, 4°28'33.6"E	50203-42195	N/A	6.3	96.3	3.6	1	78.6	48	Non-permafrost	W_EUR6_45.1k
MAM004	E393	Dicrostonyx torquatus	Trou Al'Wesse	15b	TAW	Belgium	50°25'15.6"N, 5°17'38.4"E	43664-36228	N/A	29.1	95.1	3.2	1	0.45	73	Non-permafrost	W_EUR12_35.5k
MAM006	E032	Dicrostonyx torquatus	Marie-Jeanne Cave	Horizon 5, niveau B	MJC	Belgium	50°7'48"N, 4°28'33.6"E	50203-42195	N/A	99.5	100	42.6	1	87.6	49	Non-permafrost	W_EUR2_50.0k
MAM007	E033	Dicrostonyx torquatus	Marie-Jeanne Cave	Horizon 5, niveau A+B	MJC	Belgium	50°7'48"N, 4°28'33.6"E	50203-42195	N/A	8.1	99.7	7.5	1	75.3	51	Non-permafrost	W_EUR3_48.0k
MAM008	E039	Dicrostonyx torquatus	Marie-Jeanne Cave	Horizon 5, niveau A+B	MJC	Belgium	50°7'48"N, 4°28'33.6"E	50203-42195	N/A	26.8	99.5	7.2	2	66.15	51	Non-permafrost	W_EUR1_52.2k
MAM009	E040	Dicrostonyx torquatus	Marie-Jeanne Cave	Horizon 5, niveau A+B	MJC	Belgium	50°7'48"N, 4°28'33.6"E	50203-42195	N/A	12	99.8	8.4	1	71.8	54	Non-permafrost	W_EUR4_47.6k
MAM010	E046	Dicrostonyx torquatus	Marie-Jeanne Cave	Horizon 2, Aurignacian	MJC	Belgium	50°7'48"N, 4°28'33.6"E	25648-24022	N/A	96.3	100	18.4	3	85.9	53	Non-permafrost	W_EUR15_22.9k
MAM011	E099	Dicrostonyx torquatus	Studennaya	N/A	STU	Russia	62°00'N, 58°44'E	29385-26200	N/A	8.6	99.8	8.2	3	38.2	54	Non-permafrost	W_RUS3_29.1k
MAM012	E100	Dicrostonyx torquatus	Studennaya	N/A	STU	Russia	62°00'N, 58°44'E	29385-26200	N/A	9.6	100	12.5	3	75.1	50	Non-permafrost	W_RUS2_29.9k
MAM014	E117	Dicrostonyx torquatus	Betovo	N/A	BET	Russia	53°20'38.76"N, 34°1'1.9"E	31599-26254	N/A	14.2	100	11.2	3	54.45	51	Non-permafrost	W_RUS5_27.5k
MAM015	E121	Dicrostonyx torquatus	Betovo	N/A	BET	Russia	53°20'38.76"N, 34°1'1.9"E	31599-26254	N/A	10.7	95.7	3.6	3	80.5	48	Non-permafrost	W_RUS6_26.1k
MAM018	E128	Dicrostonyx torquatus	Betovo	N/A	BET	Russia	53°20'38.76"N, 34°1'1.9"E	31599-26254	N/A	24.7	97.5	4.6	3	9.75	72	Non-permafrost	W_RUS4_28.9k
MAM020	E175	Dicrostonyx torquatus	Lobva	N/A	LOB	Siberia	59°10'44.79"N, 60°29'54.12"E	14401-0	N/A	7.9	97.2	3.7	5	16.95	51	Non-permafrost	W_RUS11_14.1k
MAM021	E181	Dicrostonyx torquatus	Lobva	N/A	LOB	Siberia	59°10'44.79"N, 60°29'54.12"E	14401-0	N/A	14.8	99.9	12.6	5	73.3	48	Non-permafrost	W_RUS7_15.9k
MAM022	E319	Dicrostonyx torquatus	Kyttyk peninsula	N/A	KYT	Siberia	69°29'17"N, 167°45'6"E	1000-0	N/A	14	100	24.8	5	46.75	82	Permafrost	E_SIB1_0.4k
MAM024	E329	Dicrostonyx torquatus	Kyttyk peninsula	N/A	KYT	Siberia	69°29'17"N, 167°45'6"E	1000-0	N/A	45.9	94.1	3.1	5	35.15	71	Permafrost	E_SIB2_0.2k
MAM026	E407	Dicrostonyx torquatus	Yangana Pe-4	L1	YAN	Siberia	67°20'24''N, 69°2'24''E	1174-0	N/A	66	100	31.8	5	83.5	74	Permafrost	W_SIB8_1.1k
MAM037	E425	Dicrostonyx torquatus	Trou Al'Wesse	15b	TAW	Belgium	50°25'15.6"N, 5°17'38.4"E	43664-36228	N/A	26.3	99.8	6.8	3	45.6	57	Non-permafrost	W_EUR13_28.9k
MAM052	E440	Dicrostonyx torquatus	Trou Al'Wesse	15c	TAW	Belgium	50°25'15.6"N, 5°17'38.4"E	43664-36228	N/A	61.5	97.1	4.4	3	11.3	77	Non-permafrost	W_EUR8_40.2k
MAM064	E206	Dicrostonyx torquatus	Ostrov Bolshevik	N/A	OBO	Siberia	79°29'47.95"N, 97°19'00.82"E	modern	N/A	12.4	97.4	3.7	5	10.95	79	Permafrost	C_SIB_O1
Notes:
*Estimated ages given in format upper-lower, radiocarbon dates given in format median±interval
**E313 mapped to itself after generating reference using mitobim and geneious

## Sheet: S3 Modern Mitogenome Samples
Table S3: Modern Mitogenome Sample Information
Sample ID	Genbank ID	Species	Site	Geographic Locality	Age	Tree labels	Dataset	Notes	Reference
Dt1T	MN792931	Dicrostonyx torquatus	Taymyr	Central Siberia	modern		Both		1
Dt10T	MN792974	Dicrostonyx torquatus	Taymyr	Central Siberia	modern		Both		1
Dt11T	MN792976	Dicrostonyx torquatus	Taymyr	Central Siberia	modern		Both		1
Dt12T	MN792980	Dicrostonyx torquatus	Taymyr	Central Siberia	modern		Both		1
Dt13T	MN792981	Dicrostonyx torquatus	Taymyr	Central Siberia	modern		Both		1
Dt14T	MN792935	Dicrostonyx torquatus	Taymyr	Central Siberia	modern		Both		1
Dt2T	MN792946	Dicrostonyx torquatus	Taymyr	Central Siberia	modern		Both		1
Dt3T	MN792964	Dicrostonyx torquatus	Taymyr	Central Siberia	modern		Both		1
Dt4T	MN792968	Dicrostonyx torquatus	Taymyr	Central Siberia	modern		Both		1
Dt5T	MN792969	Dicrostonyx torquatus	Taymyr	Central Siberia	modern		Both		1
Dt6T	MN792970	Dicrostonyx torquatus	Taymyr	Central Siberia	modern		Both		1
Dt7T	MN792971	Dicrostonyx torquatus	Taymyr	Central Siberia	modern		Both		1
Dt8T	MN792972	Dicrostonyx torquatus	Taymyr	Central Siberia	modern		Both		1
Dt9T	MN792973	Dicrostonyx torquatus	Taymyr	Central Siberia	modern		Both		1
Dt1LK	MN792934	Dicrostonyx torquatus	Yana-Kolyma	Central Siberia	modern		Both		1
Dt10LK	MN792983	Dicrostonyx torquatus	Yana-Kolyma	Central Siberia	modern		Both		1
Dt2LK	MN792950	Dicrostonyx torquatus	Yana-Kolyma	Central Siberia	modern		Both		1
Dt3LK	MN792944	Dicrostonyx torquatus	Yana-Kolyma	Central Siberia	modern		Both		1
Dt4LK	MN792955	Dicrostonyx torquatus	Yana-Kolyma	Central Siberia	modern		Both	Duplicate sequence; removed	1
Dt5LK	MN792945	Dicrostonyx torquatus	Yana-Kolyma	Central Siberia	modern		Both		1
Dt6LK	MN792959	Dicrostonyx torquatus	Yana-Kolyma	Central Siberia	modern		Both		1
Dt7LK	MN792961	Dicrostonyx torquatus	Yana-Kolyma	Central Siberia	modern		Both		1
Dt8LK	MN792977	Dicrostonyx torquatus	Yana-Kolyma	Central Siberia	modern		Both		1
Dt9LK	MN792979	Dicrostonyx torquatus	Yana-Kolyma	Central Siberia	modern		Both		1
Dt8WB	MN792947	Dicrostonyx torquatus	East Siberia	East Siberia	modern		Both		1
Dt9WB	MN792943	Dicrostonyx torquatus	East Siberia	East Siberia	modern		Both		1
Dt10WB	MN792949	Dicrostonyx torquatus	East Siberia	East Siberia	modern		Both		1
Dt11WB	KX066190	Dicrostonyx torquatus	East Siberia	East Siberia	modern		Both	Duplicate sequence; removed	1
Dt12WB	MN792962	Dicrostonyx torquatus	East Siberia	East Siberia	modern		Both		1
Dt13WB	MN792960	Dicrostonyx torquatus	East Siberia	East Siberia	modern		Both		1
Dt14WB	MN792963	Dicrostonyx torquatus	East Siberia	East Siberia	modern		Both		1
Dt15WB	MN792978	Dicrostonyx torquatus	East Siberia	East Siberia	modern		Both	Duplicate sequence; removed	1
Dt16WB	MN792982	Dicrostonyx torquatus	East Siberia	East Siberia	modern		Both		1
Dt1WB	MN792936	Dicrostonyx torquatus	East Siberia	East Siberia	modern		Both		1
Dt2WB	MN792937	Dicrostonyx torquatus	East Siberia	East Siberia	modern		Both		1
Dt3WB	MN792938	Dicrostonyx torquatus	East Siberia	East Siberia	modern		Both		1
Dt4WB	MN792939	Dicrostonyx torquatus	East Siberia	East Siberia	modern		Both		1
Dt5WB	MN792940	Dicrostonyx torquatus	East Siberia	East Siberia	modern		Both		1
Dt6WB	MN792941	Dicrostonyx torquatus	East Siberia	East Siberia	modern		Both		1
Dt7WB	MN792942	Dicrostonyx torquatus	East Siberia	East Siberia	modern		Both		1
Dt3P	MN792952	Dicrostonyx torquatus	Pechora	West Siberia	modern		Both		1
Dt4P	MN792953	Dicrostonyx torquatus	Pechora	West Siberia	modern		Both	Duplicate sequence; removed	1
Dt1P	MN792933	Dicrostonyx torquatus	Pechora	West Siberia	modern		Both		1
Dt2P	MN792951	Dicrostonyx torquatus	Pechora	West Siberia	modern		Both	Duplicate sequence; removed	1
Dt5Y	MN792956	Dicrostonyx torquatus	Yamal	West Siberia	modern		Both		1
Dt6Y	MN792965	Dicrostonyx torquatus	Yamal	West Siberia	modern		Both		1
Dt7Y	MN792966	Dicrostonyx torquatus	Yamal	West Siberia	modern		Both		1
Dt8Y	MN792967	Dicrostonyx torquatus	Yamal	West Siberia	modern		Both		1
Dt9Y	MN792975	Dicrostonyx torquatus	Yamal	West Siberia	modern		Both		1
Dt10Y	MN792954	Dicrostonyx torquatus	Yamal	West Siberia	modern		Both		1
Dt1Y	MN792948	Dicrostonyx torquatus	Yamal	West Siberia	modern		Both		1
Dt2Y	MN792957	Dicrostonyx torquatus	Yamal	West Siberia	modern		Both		1
Dt3Y	MN792958	Dicrostonyx torquatus	Yamal	West Siberia	modern		Both		1
Dt4Y	MN792932	Dicrostonyx torquatus	Yamal	West Siberia	modern		Both		1
P7857	N/A	Dicrostonyx torquatus	East Siberia	East Siberia	modern		Both	Duplicate sequence; removed	2
KX066190	KX066190	Dicrostonyx torquatus	East Siberia	East Siberia	modern		Both		3
Dg1A	KX712239	Dicrostonyx groenlandicus	Alaska	North America	modern		2 only		1
Dg2A	MN792984	Dicrostonyx groenlandicus	Alaska	North America	modern		2 only		1
Dg3C	MN792987	Dicrostonyx groenlandicus	Alaska	North America	modern		2 only		1
Dg4A	MN792985	Dicrostonyx groenlandicus	Alaska	North America	modern		2 only		1
Dg5A	MN792988	Dicrostonyx groenlandicus	Alaska	North America	modern		2 only		1
Dg6A	MN792986	Dicrostonyx groenlandicus	Alaska	North America	modern		2 only		1
KX683880	KX683880	Dicrostonyx hudsonius	Ungava Peninsula	Canada	modern		2 only		3
References:
1	Fedorov, Vadim B., Emiliano Trucchi, Anna V. Goropashnaya, Eric Waltari, Susan Erin Whidden, and Nils Chr Stenseth. "Impact of past climate warming on genomic diversity and demographic history of collared lemmings across the Eurasian Arctic." Proceedings of the National Academy of Sciences 117, no. 6 (2020): 3026-3033.
2	This study
3	Fedorov, Vadim B., and Anna V. Goropashnaya. "Complete mitochondrial genomes of the North American collared lemmings Dicrostonyx groenlandicus Traill, 1823 and Dicrostonyx hudsonius Pallas, 1778 (Rodentia: Arvicolinae)." Mitochondrial DNA Part B 1, no. 1 (2016): 878-879.

## Sheet: S4 BEAST Divergence times
Table S4: Divergence times for each node in the phylogenetic tree (Fig 2a) estimated using BEAST
Node Label	Median age	95% HPD Lower	95% HPD Upper
A	1761747	1504747	2025283
B	515645	441112	596628
C	219682	196693	244717
D	100294	92170	109012
E	111233	97764	126412
F	90813	83518	98451
G	63152	58493	68285
H	56678	51753	61879
I	27908	25716	30358
J	27182	25318	29305
K	20808	19030	22580
L	17729	16459	19207
M	16907	14527	19528

## Sheet: S5 BEAST priors and ages
Table S5: The priors used to specify tip-date information for each ancient sample in the phylogenetic analysis
Sample ID	Phylogenetic Tree Label	Uniform lower	Uniform upper	Lognormal Mean	Lognormal SD	Normal Median	Normal SD	Median Age	95% HPD Lower	95% HPD Upper
E106	W_RUS1_31.1k	N/A	N/A	N/A	N/A	31188	393	31199	30421	31928
E183	W_RUS10_14.9k	N/A	N/A	N/A	N/A	14834	364.5	14938	14265	15607
E313	N/A	N/A	N/A	12.3	0.325	N/A	N/A	333293	220206	451867
E335	W_RUS9_15.5k	N/A	N/A	N/A	N/A	15677	269	15567	15074	16098
E337	W_RUS8_15.7k	N/A	N/A	N/A	N/A	15677	269	15779	15261	16311
EL014	W_EUR9_39.3k	N/A	N/A	N/A	N/A	39946.5	3718	39337	35317	43251
EL015	W_EUR10_38.8k	N/A	N/A	N/A	N/A	39946.5	3718	38800	34612	42997
EL016	W_EUR7_40.9k	N/A	N/A	N/A	N/A	39946.5	3718	40965	37533	44511
EL017	W_SIB5_1.5k	N/A	N/A	N/A	N/A	1634	263	1592	1103	2063
EL018	W_SIB6_1.4k	N/A	N/A	N/A	N/A	1634	263	1495	998	1977
EL020	W_SIB4_1.5k	N/A	N/A	N/A	N/A	1634	263	1543	1061	2016
EL022	W_EUR11_37.8k	N/A	N/A	N/A	N/A	39946.5	3718	37820	32386	43007
EL048	W_EUR14_24.2k	N/A	N/A	N/A	N/A	24495	7310	24287	22332	26579
EL049	W_EUR28_11.5k	N/A	N/A	N/A	N/A	24495	7310	11511	6626	16139
EL050	W_EUR25_20.3k	N/A	N/A	N/A	N/A	24495	7310	20377	18805	21855
EL051	W_EUR27_19.5k	N/A	N/A	N/A	N/A	24495	7310	19555	17446	21493
EL052	W_EUR26_20.3k	N/A	N/A	N/A	N/A	24495	7310	20359	18835	21836
EL053	W_EUR16_22.4k	N/A	N/A	N/A	N/A	24495	7310	22464	20303	24570
EL054	W_EUR23_20.9k	N/A	N/A	N/A	N/A	20705	829.5	20970	19700	22208
EL056	W_EUR22_21.0k	N/A	N/A	N/A	N/A	20705	829.5	21047	19731	22369
EL057	W_EUR19_21.8k	N/A	N/A	N/A	N/A	20705	829.5	21811	20304	23301
EL058	W_EUR24_20.4k	N/A	N/A	N/A	N/A	20705	829.5	20419	19245	21712
EL059	W_EUR21_21.5k	N/A	N/A	N/A	N/A	21834.5	382.5	21502	20809	22218
EL060	W_EUR18_21.8k	N/A	N/A	N/A	N/A	21834.5	382.5	21859	21125	22611
EL062	W_EUR17_21.9k	N/A	N/A	N/A	N/A	21834.5	382.5	21975	21227	22726
EL063	W_EUR20_21.7k	N/A	N/A	N/A	N/A	21834.5	382.5	21787	21054	22531
L161L1	E_EUR4_22.8k	0	50000	N/A	N/A	N/A	N/A	22813	20759	25060
L165L1	E_EUR2_23.8k	0	50000	N/A	N/A	N/A	N/A	23851	20986	26906
L210L1	E_EUR5_18.8k	N/A	N/A	N/A	N/A	18849	174	18869	18532	19209
L211L1	E_EUR3_23.4k	N/A	N/A	N/A	N/A	23443	346	23596	22945	24248
L216L1	E_EUR9_17.5k	N/A	N/A	N/A	N/A	17539	250	17462	16980	17945
L222L1	E_EUR8_17.6k	N/A	N/A	N/A	N/A	17654	257	17715	17199	18195
L224L1	E_EUR1_24.8k	N/A	N/A	N/A	N/A	24822	422	24727	23922	25477
L225L1	E_EUR6_18.4k	N/A	N/A	N/A	N/A	18483	223	18547	18116	18964
L236L1	E_EUR10_16.3k	N/A	N/A	N/A	N/A	16371	240	16364	15906	16829
L237L1	E_EUR7_18.3k	N/A	N/A	N/A	N/A	18375	215	18383	17965	18786
L242L1	E_EUR11_15.6k	N/A	N/A	N/A	N/A	15665	278	15645	15110	16183
MAM001	W_SIB7_1.3k	N/A	N/A	N/A	N/A	587	587	1392	403	2395
MAM002	W_EUR5_47.1k	N/A	N/A	N/A	N/A	48134	6979	47145	42784	51692
MAM003	W_EUR6_45.1k	N/A	N/A	N/A	N/A	46339	4004	45129	40590	49898
MAM004	W_EUR12_35.5k	N/A	N/A	N/A	N/A	39946.5	3718	35567	30349	40144
MAM006	W_EUR2_50.0k	N/A	N/A	N/A	N/A	46339	4004	50072	46189	53851
MAM007	W_EUR3_48.0k	N/A	N/A	N/A	N/A	46339	4004	48072	44243	52153
MAM008	W_EUR1_52.2k	N/A	N/A	N/A	N/A	46339	4004	52226	45594	59034
MAM009	W_EUR4_47.6k	N/A	N/A	N/A	N/A	46339	4004	47635	43658	51371
MAM010	W_EUR15_22.9k	N/A	N/A	N/A	N/A	24839.5	813	22937	21543	24328
MAM011	W_RUS3_29.1k	N/A	N/A	N/A	N/A	27792.5	1592.5	29108	26883	31311
MAM012	W_RUS2_29.9k	N/A	N/A	N/A	N/A	27792.5	1592.5	29975	27695	32153
MAM014	W_RUS5_27.5k	N/A	N/A	N/A	N/A	28791.5	2672.5	27525	24807	30188
MAM015	W_RUS6_26.1k	N/A	N/A	N/A	N/A	28791.5	2672.5	26115	22210	29994
MAM018	W_RUS4_28.9k	N/A	N/A	N/A	N/A	28791.5	2672.5	28993	25375	32464
MAM020	W_RUS11_14.1k	N/A	N/A	N/A	N/A	7200.5	7200.5	14166	11514	16527
MAM021	W_RUS7_15.9k	N/A	N/A	N/A	N/A	7200.5	7200.5	15974	12307	19274
MAM022	E_SIB1_0.4k	N/A	N/A	N/A	N/A	500	500	453	0	1086
MAM024	E_SIB2_0.2k	N/A	N/A	N/A	N/A	500	500	286	0	836
MAM026	W_SIB8_1.1k	N/A	N/A	N/A	N/A	587	587	1164	290	1981
MAM037	W_EUR13_28.9k	N/A	N/A	N/A	N/A	39946.5	3718	28981	25723	32278
MAM052	W_EUR8_40.2k	N/A	N/A	N/A	N/A	39946.5	3718	40266	36573	43946
MAM064	C_SIB_O1	N/A	N/A	N/A	N/A	0	0	0	0	0

## Sheet: S6 ABC modelling
Table S6: Demographic Modelling using Approximate Bayesian Computation
Model	Proportion of accepted simulations (rejection)
Constant	0.0000
LGM bottleneck	0.4872
Eemian bottleneck	0.0005
LGM+Eemian bottleneck	0.5123

## Sheet: S7 Marginal Likelihood Estimate
Table S7: Marginal Likelihood Estimation for demographic models: constant size,skyline, skyride
Model	Stepping-stone sampling		Path Sampling
	Log Marginal Likelihood	Log Bayes Factor	Log Marginal Likelihood	Log Bayes Factor
Bayesian Skyride	-40526.3	44.85	-40525.7	46.17
Constant Size	-40484.1	2.61597	-40484.8	5.30657
Bayesian Skyline	-40481.5	*	-40479.5	*

## Sheet: S8 Demographic model setup
Table S8: Information used to generate the simulated data for the ABC analysis
Simulated population	Clade	Number of samples	Age
0	5	51	modern
1	5	2	370
2	5	5	1437
3	5	8	15490
4	5	6	18746
5	4	6	20455
6	3	8	22645
7	4	3	24069
8	3	7	28842
9	1	2	36694
10	3	4	39842
11	1	5	47611
12	2	1	52226
